# Supplementary material for: Adhesive RAFT agents for controlled polymerization of acrylamide: effect of catechol-end R groups
Source: Royal Society of Chemistry journal article supplement (doi:10.1039/c5ra16193b), 2015-01-01
Supplement: c5ra16193b1.pdf [file c5ra16193b1.pdf]

## Supporting Information

### Adhesive RAFT Agents for Controlled Polymerization of Acrylamide: Effect of Catechol-end R Groups

*Olabode O. Oyeneye, William Z. Xu, Paul A. Charpentier\**

Department of Chemical and Biochemical Engineering, University of Western Ontario, London

ON N6A-5B9 Canada

\*Corresponding author: [pcharpentier@eng.uwo.ca](mailto:pcharpentier@eng.uwo.ca)

#### Experimental Section Complement

**Characterization:** 1D ( $^1\text{H}$  and  $^{13}\text{C}$ ) and 2D (gHSQC, gHMBC) NMR spectra were measured using either a Varian INOVA 600 or a Varian INOVA 400 spectrometer. gHSQC was recorded with multiplicity edited.  $\text{CDCl}_3$ ,  $\text{D}_2\text{O}$ , or  $\text{DMSO-d}_6$  was used as the solvent and chemical shifts were referenced to tetramethylsilane (TMS; 0.0 ppm). The AM concentration [AM] was determined based on the  $^1\text{H}$  NMR signals of the olefinic protons. ATR-FTIR spectra were recorded at a resolution of  $6\text{ cm}^{-1}$  over 64 scans using a mid-IR spectrometer (Nicolet 6700) equipped with smart diamond ATR (attenuated total reflection). UV-Vis spectra were recorded on a Shimadzu UV-3600 (UV-VIS-NIR) Spectrophotometer equipped with two lamps (halogen and deuterium) and three detectors (photomultiplier tube, InGaAs and cooled PbS) at room temperature. Molecular weight ( $M_n$ ) and dispersity ( $\text{Đ}$ ) of the synthesized PAM samples were measured by a Viscotek GPC Max VE 2001 gel permeation chromatography equipped with a triple detector array (TDA 302) including a refractive index detector (RI), a viscometer, and two light scattering detectors (low angle and right angle, 670 nm). 0.10 M  $\text{NaNO}_3$ /1.15 mM  $\text{NaN}_3$  aqueous solution was used as mobile phase at a flow rate of 0.7 mL/min. Two PolyAnalytik columns (A206:

23  $20 \times 10^6$  Da,  $130 \text{ \AA}$ ) were employed to separate the samples at  $35^\circ\text{C}$ , which were calibrated by a  
24 polyethylene oxide (PEO, MW: 18600 Da, PDI: 1.03,  $\alpha = 0.69$ ,  $K = 3.7 \times 10^{-4} \text{ dl/g}$ ) standard. The  
25  $dn/dc$  value of PAM in the eluent was pre-determined to be  $0.15 \text{ mL/g}$  using a refractometer.  
26 The molecular weight averages and dispersities were calculated using OmniSEC software (Ver.  
27 4.5.6.268). The molecular weight ( $M_n$ ) of catechol end-functionalized polyacrylamide samples  
28 was also determined based on end group analysis of the  $^1\text{H}$  NMR spectra of the sample.  
29 Thermal properties of the synthesized materials were evaluated via thermogravimetric analysis  
30 (TGA) on a SDT Q600, TA instruments by heating the materials from room temperature to  
31  $700^\circ\text{C}$  at a heating rate of  $10^\circ\text{C}/\text{min}$  under air. A Malvern Zetasizer Nano S (Model: ZEN 1600)  
32 was used to characterize the particle size (PS) of the  $\text{Al}_2\text{O}_3$ -PAM nanocomposites based on  
33 dynamic light scattering (DLS). The Zetasizer Nano S was equipped with a  $633 \text{ nm}$  He-NE laser  
34 source, and at a scattering angle of  $173^\circ$ . Prior to the PS determination which was done in  
35 triplicate, the samples were prepared to a concentration of  $10 \text{ mg/L}$  using distilled water as the  
36 dispersion medium (room temperature), and ultra-sonicated for  $5 - 10 \text{ min}$  to obtain a well-  
37 dispersed suspension.

## 38 Supporting Data

39 **Table S2:** RAFT Polymerization of acrylamide mediated with Dopa- CTAs

| Dopa-CTA (3) | Time (min) | $M_n$ /GPC | $M_n$ /NMR* | $M_w/M_n$ |
|--------------|------------|------------|-------------|-----------|
| (3a)         | 60         | 14800      | 14400       | 1.19      |
| (3b)         | 60         | 13900      | 10600       | 1.21      |
| (3c)         | 60         | 9400       | 8500        | 1.21      |

40 Reaction conditions:  $[AM]_0:[Dopa-CTA]_0:[ACVA]_0 = 2500:5:1$ ,

41 Solvent = 24.5 mL DMSO/DMF (97:3, vol%), Temp = 70°C,  $[AM]_0 = 2M$ .

42 \* $M_n$  values determined by end-group analysis of the  $^1H$  NMR spectra

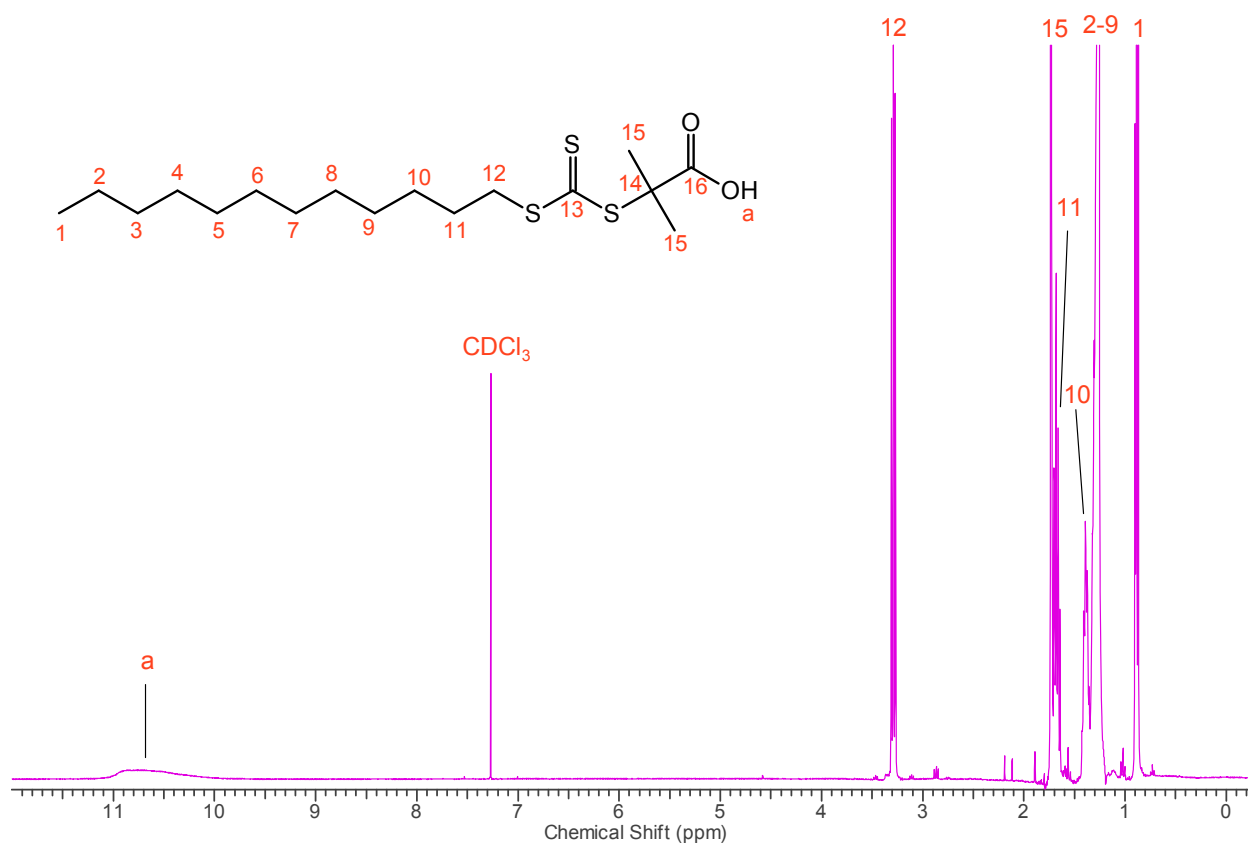

43

44 **Figure S1.** Complete  $^1H$  NMR spectra of (1a) DDMAT (600 MHz, @ 25°C).

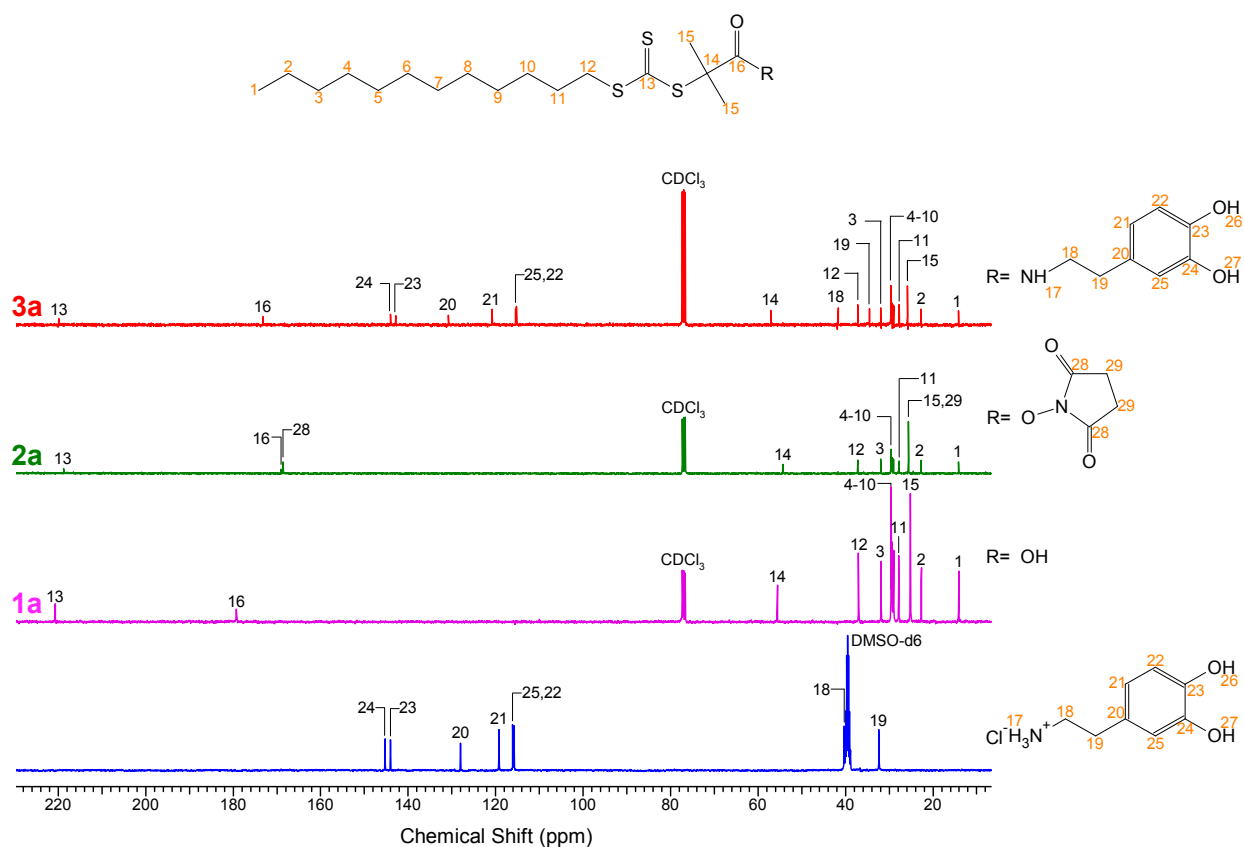

45

46 **Figure S2.**  $^{13}\text{C}$  NMR spectra of (bottom) dopamine hydrochloride, (1a) DDMAT, (2a) Suc-DDMAT  
 47 and (3a) Dopa-DDMAT in  $\text{CDCl}_3$  (100 MHz, @  $25^\circ\text{C}$ )

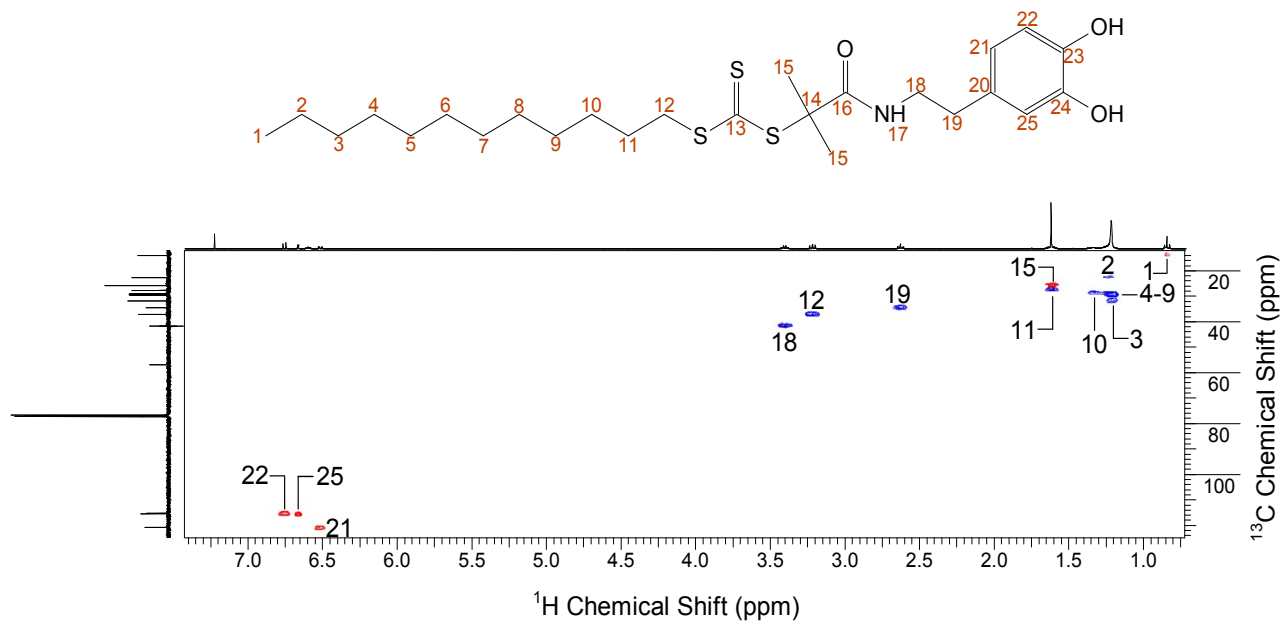

48

49 **Figure S3.** gHSQC NMR spectrum of Dopa-DDMAT (3a) in  $\text{CDCl}_3$  (100 MHz, @  $25^\circ\text{C}$ ).

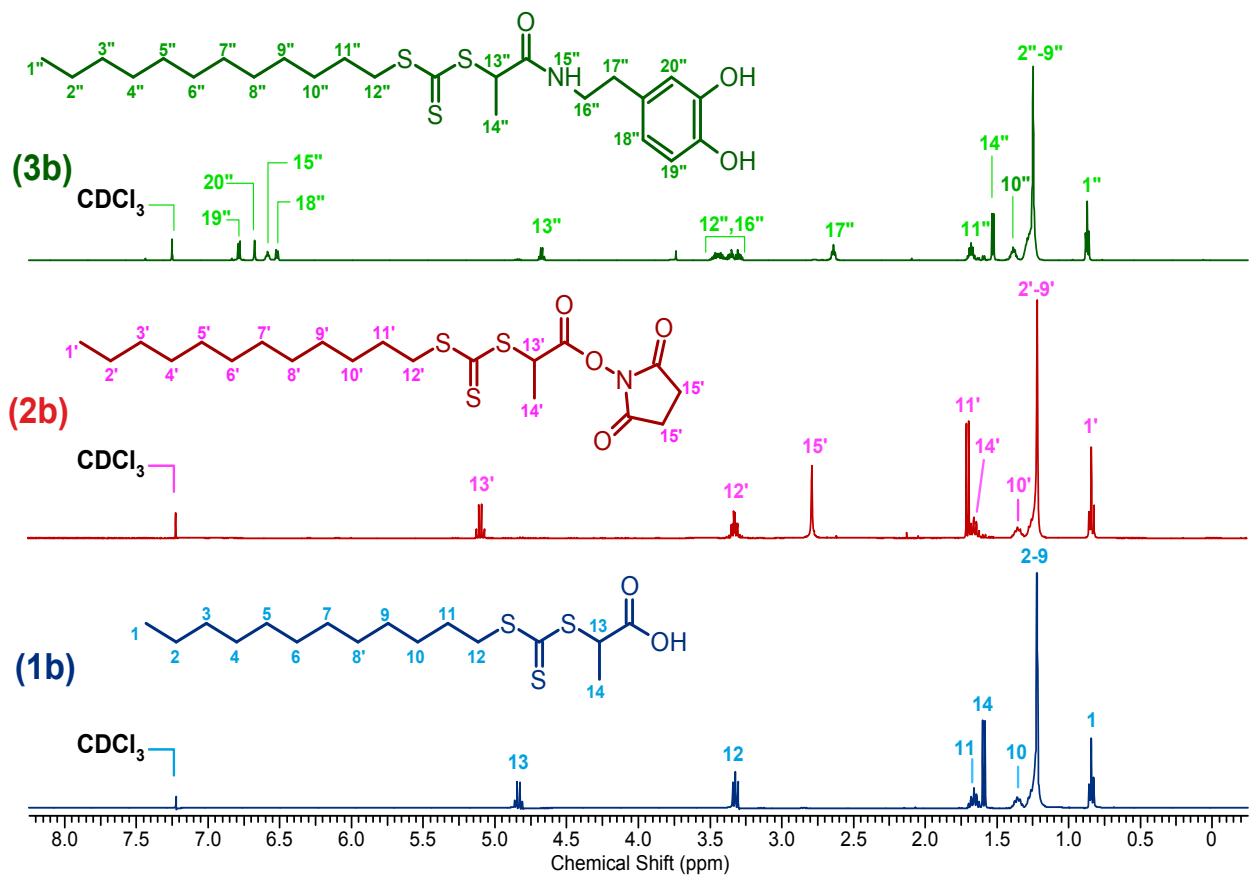

50  
51

52 **Figure S4.**  $^1\text{H}$  NMR Spectra of **(1b)** DoPAT, **(2b)** Suc-DoPAT and **(3b)** Dopa-DoPAT in  $\text{CDCl}_3$  (600  
53 MHz, @ 25°C)

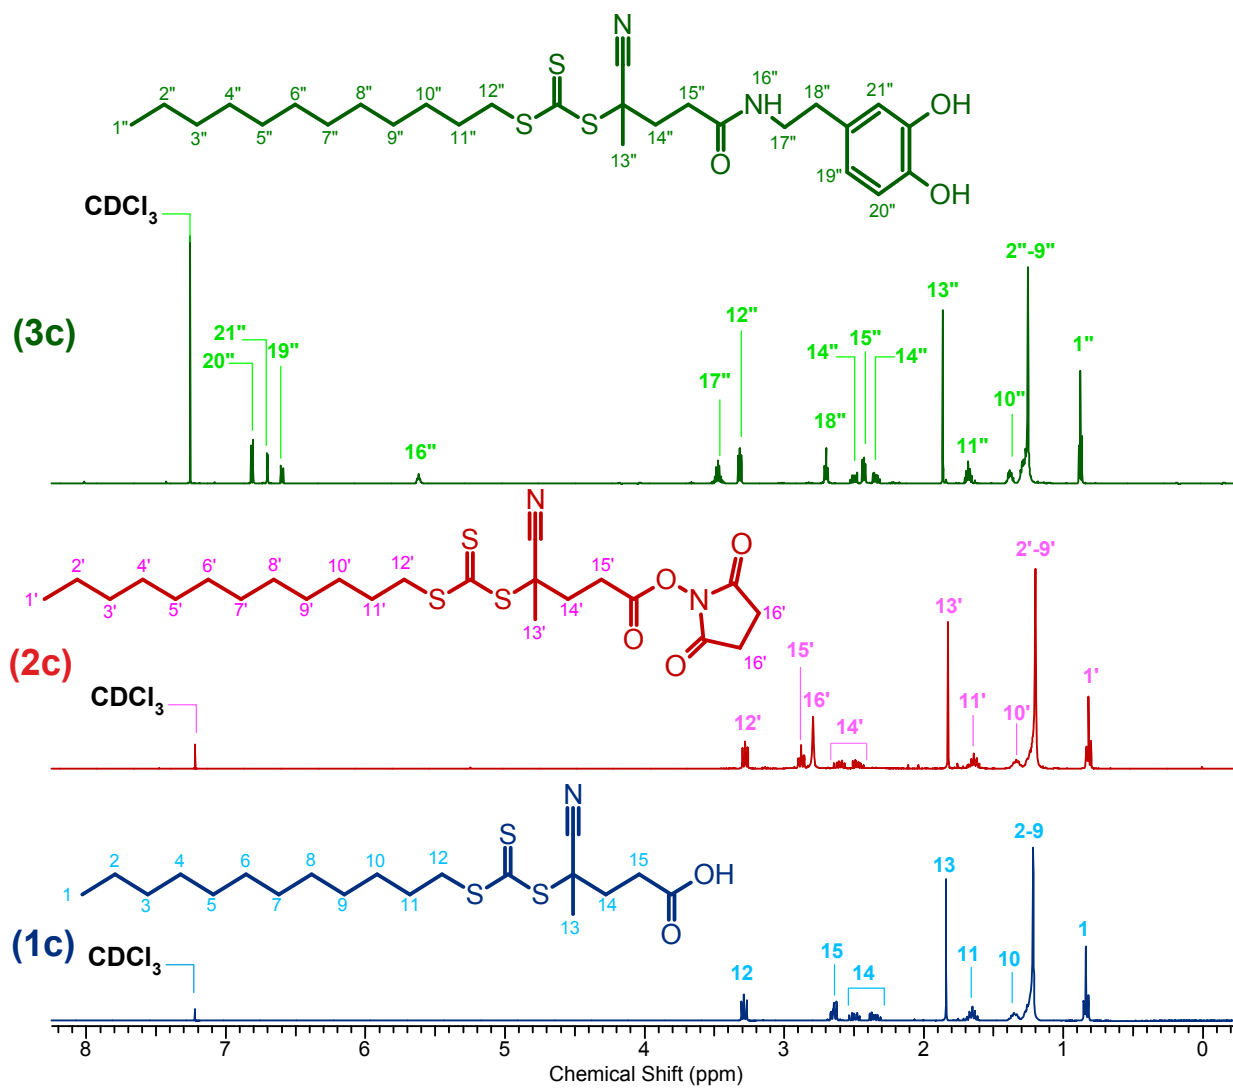

54

55 **Figure S5.**  $^1\text{H}$  NMR Spectra of (1c) CDSPA, (2c) Suc-CDSPA and (3c) Dopa-CDSPA in  $\text{CDCl}_3$  (600  
 56 MHz, @ 25°C)

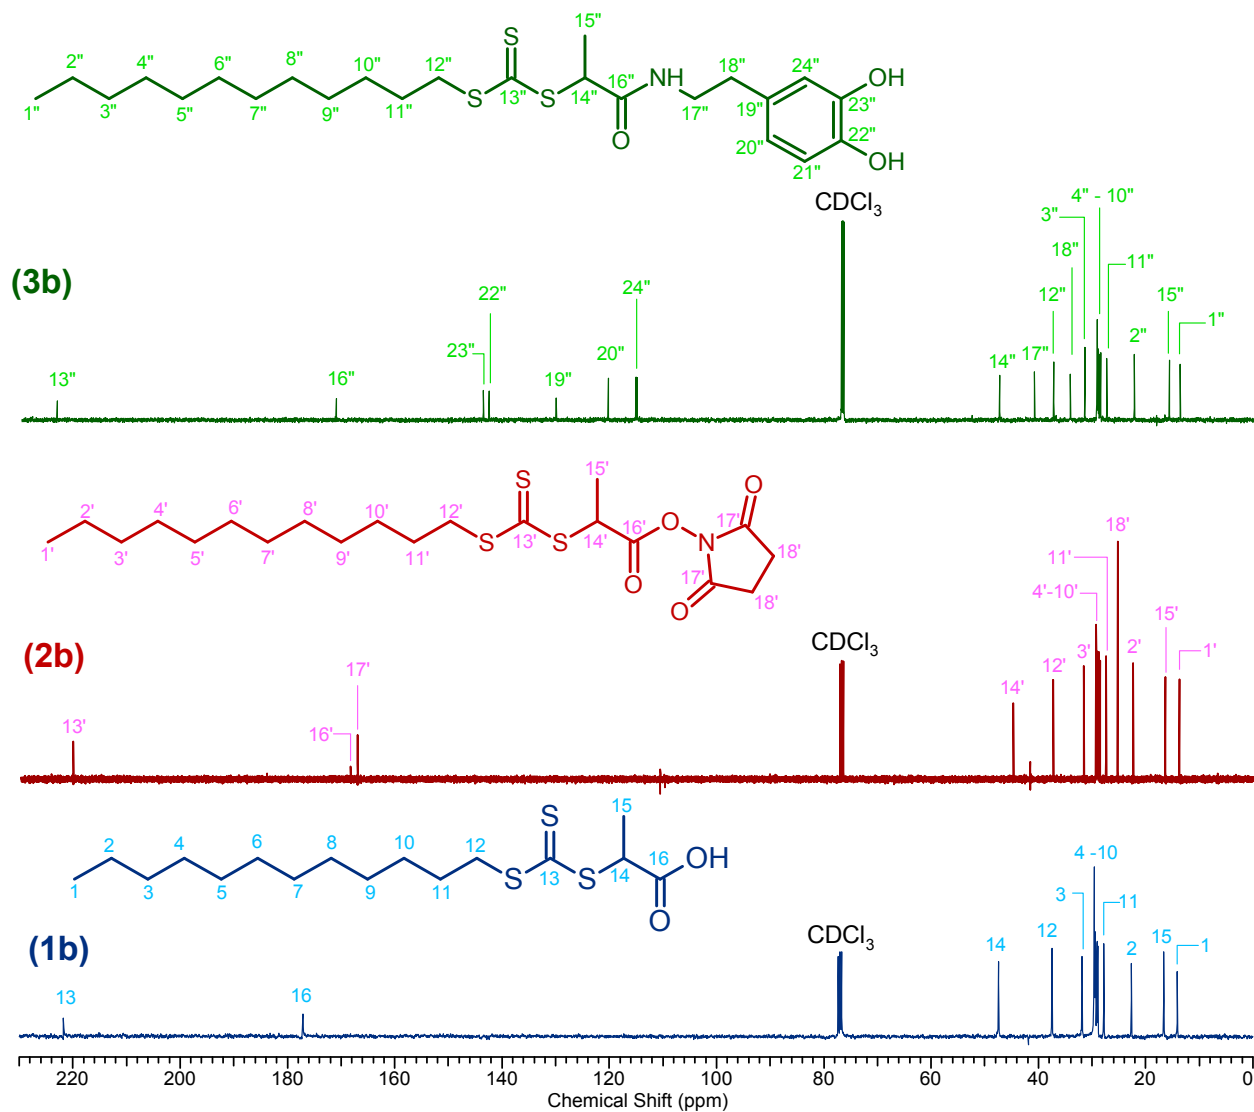

57  
58

59 **Figure S6.** <sup>13</sup>C NMR of **(1b)** DoPAT, **(2b)** Suc-DoPAT and **(3b)** Dopa-DoPAT in CDCl<sub>3</sub> (100 MHz, @  
60 25°C)

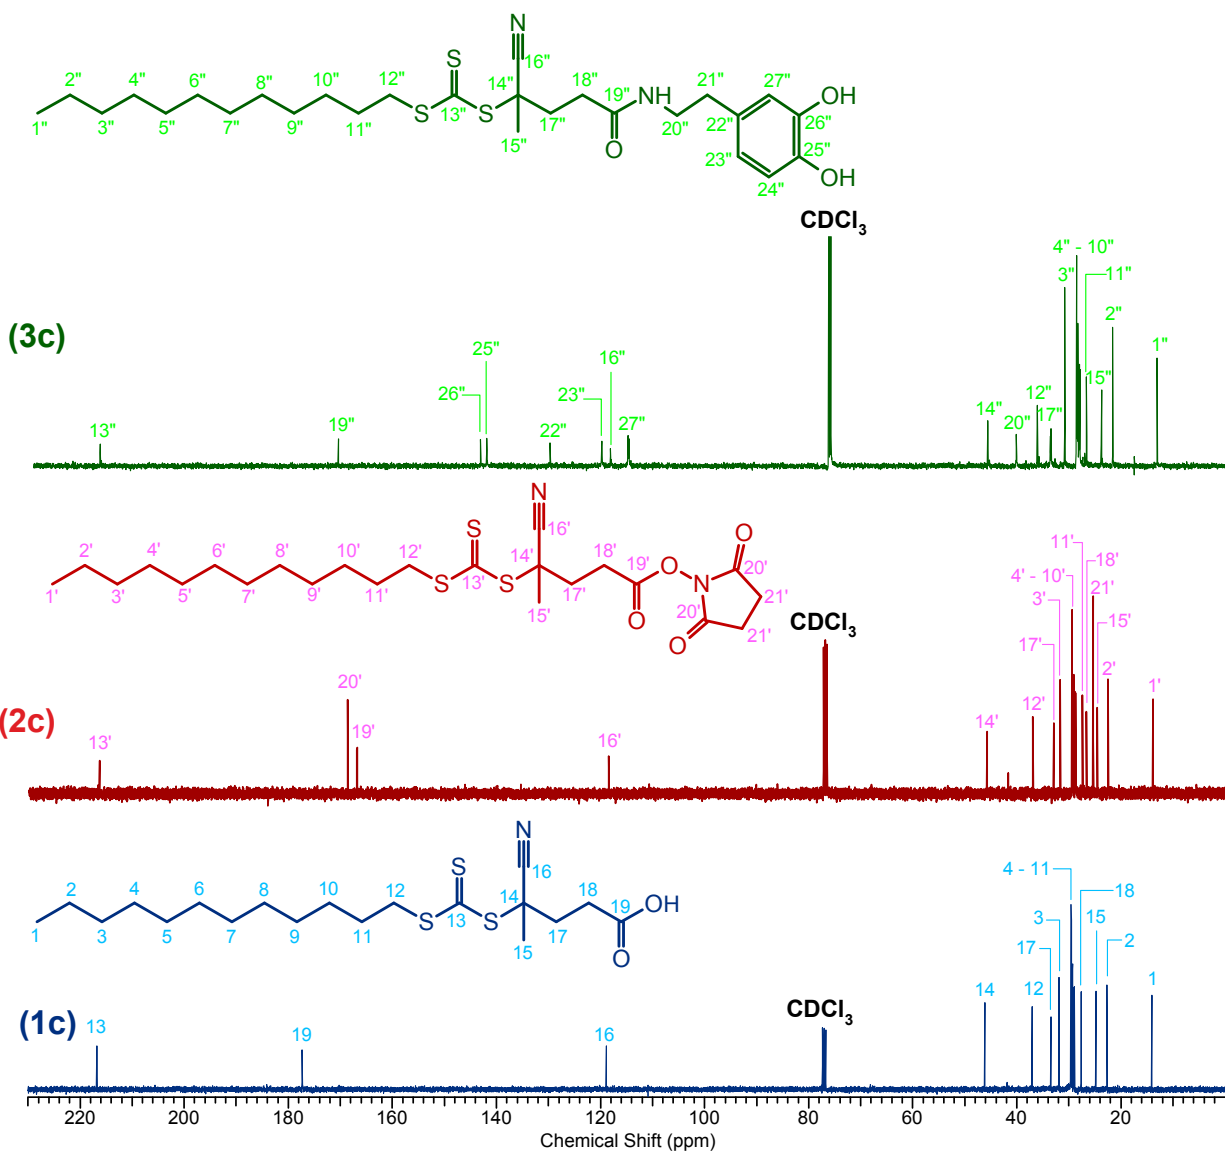

61

62 **Figure S7.**  $^{13}\text{C}$  NMR of (1c) CDSPA, (2c) Suc-CDSPA and (3c) Dopa-CDSPA in  $\text{CDCl}_3$  (100 MHz, @  
 63 25°C)



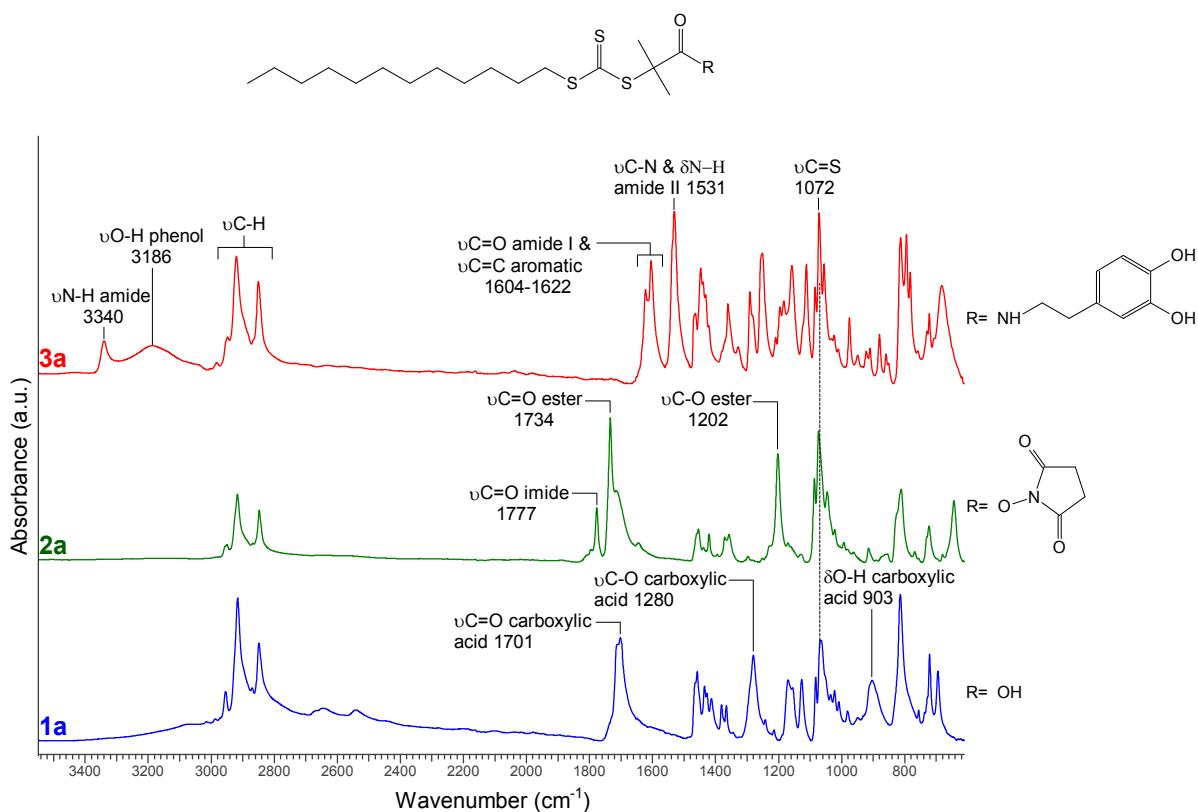

64

65 **Figure S8.** ATR-FTIR spectra of (1a) DDMAT, (2a) Suc-DDMAT and (3a) Dopa-DDMAT.

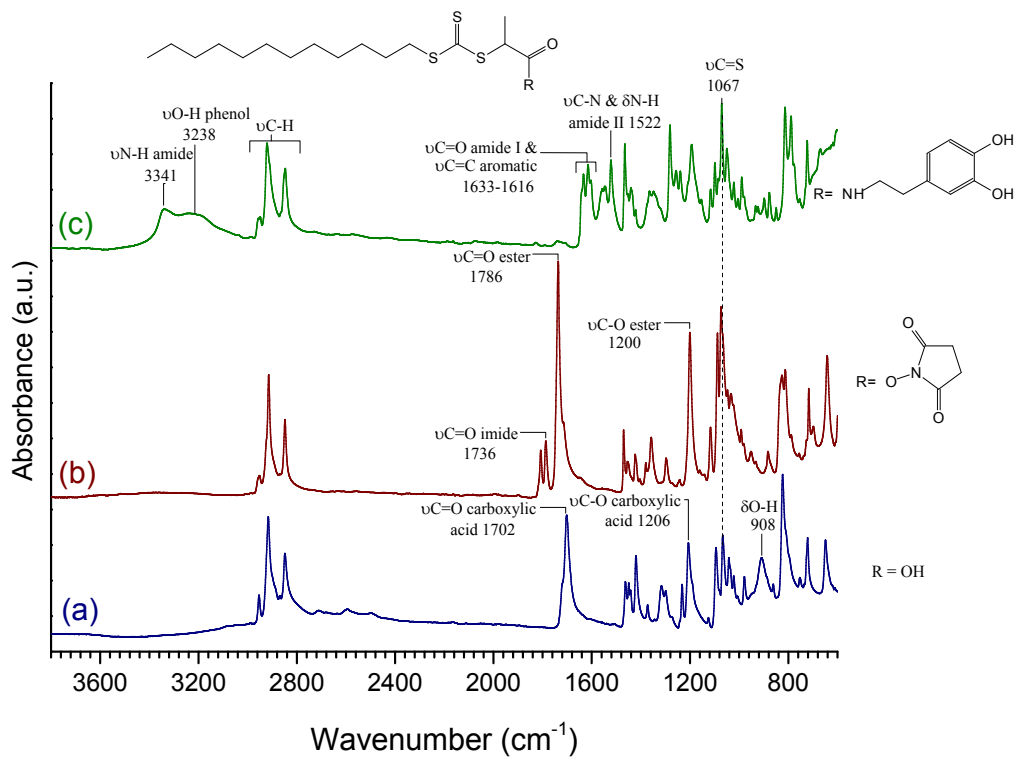

66

67 **Figure S9.** ATR-FTIR Spectra of (1b) DoPAT, (2b) Suc-DoPAT and (3b) Dopa-DoPAT

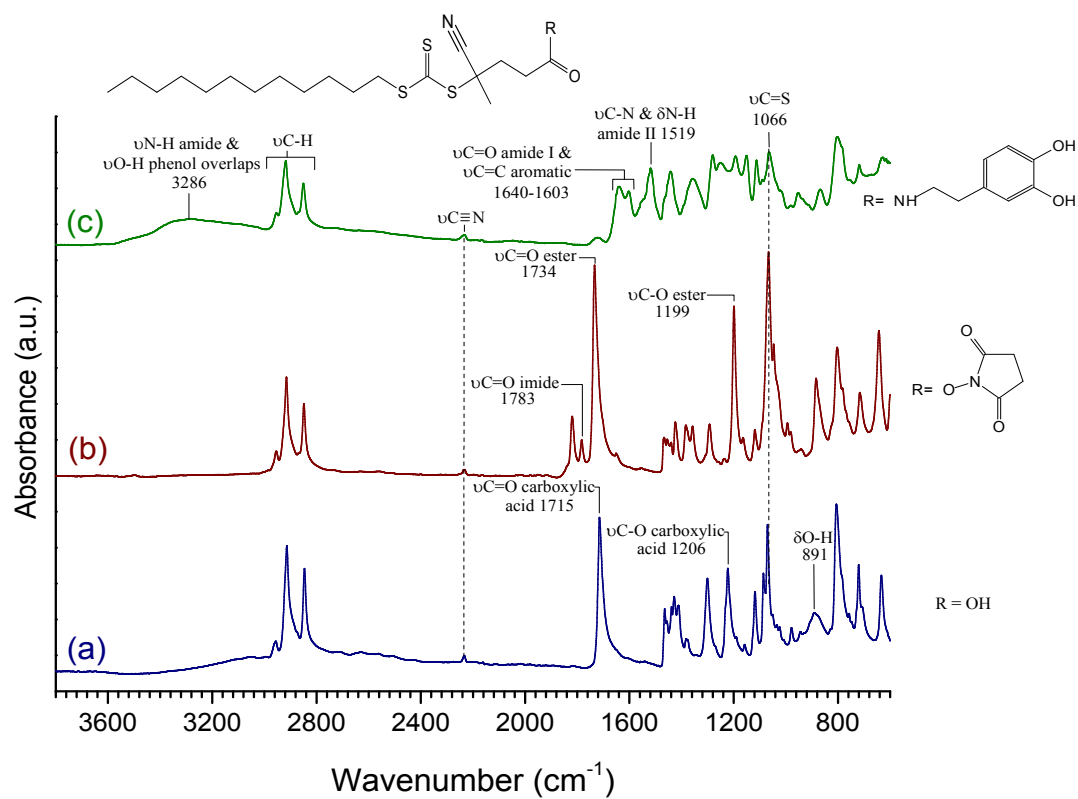

68

69 **Figure S10.** ATR-FTIR Spectra of **(1c)** CDSPA, **(2c)** Suc-CDSPA and **(3c)** Dopa-CDSPA

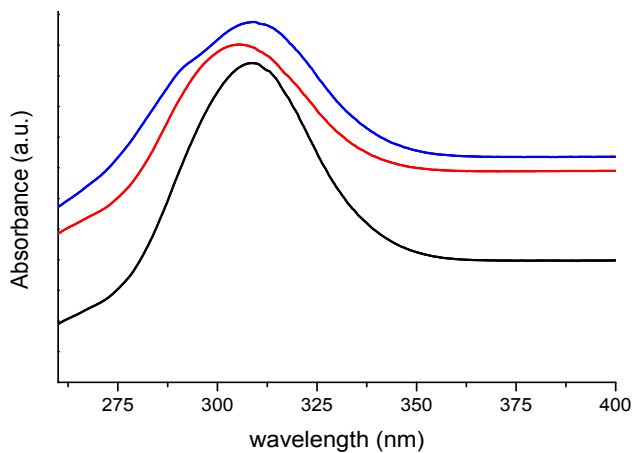

**Figure S11.** UV-vis absorbance spectra of 0.05 mM each of **(1a)**, black) DDMAT, **(2a)**, red) Suc-DDMAT and **(3a)**, blue) Dopa-DDMAT in MeOH

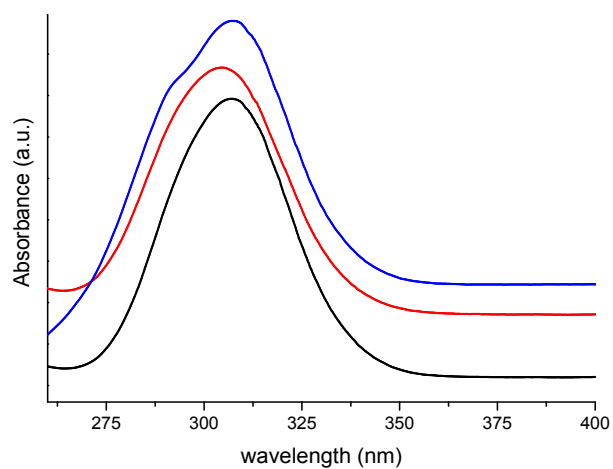

**Figure S12.** UV-vis absorbance spectra of 0.05 mM each of **(1b)**, black) DoPAT, Suc-DoPAT **(2b)**, red) and **(3b)**, blue) Dopa-DoPAT in MeOH

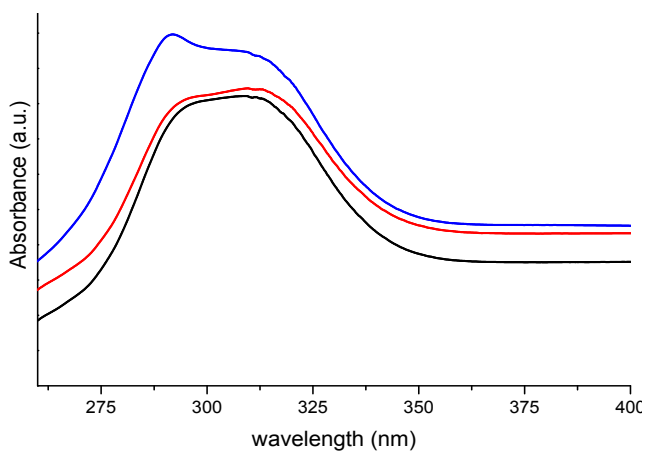

**Figure S13.** UV-vis absorbance spectra of 0.05 mM each of **(1c)**, black) CDSPA, **(2c)**, red) Suc-CDSPA and **(3c)**, blue) Dopa-CDSPA in MeOH

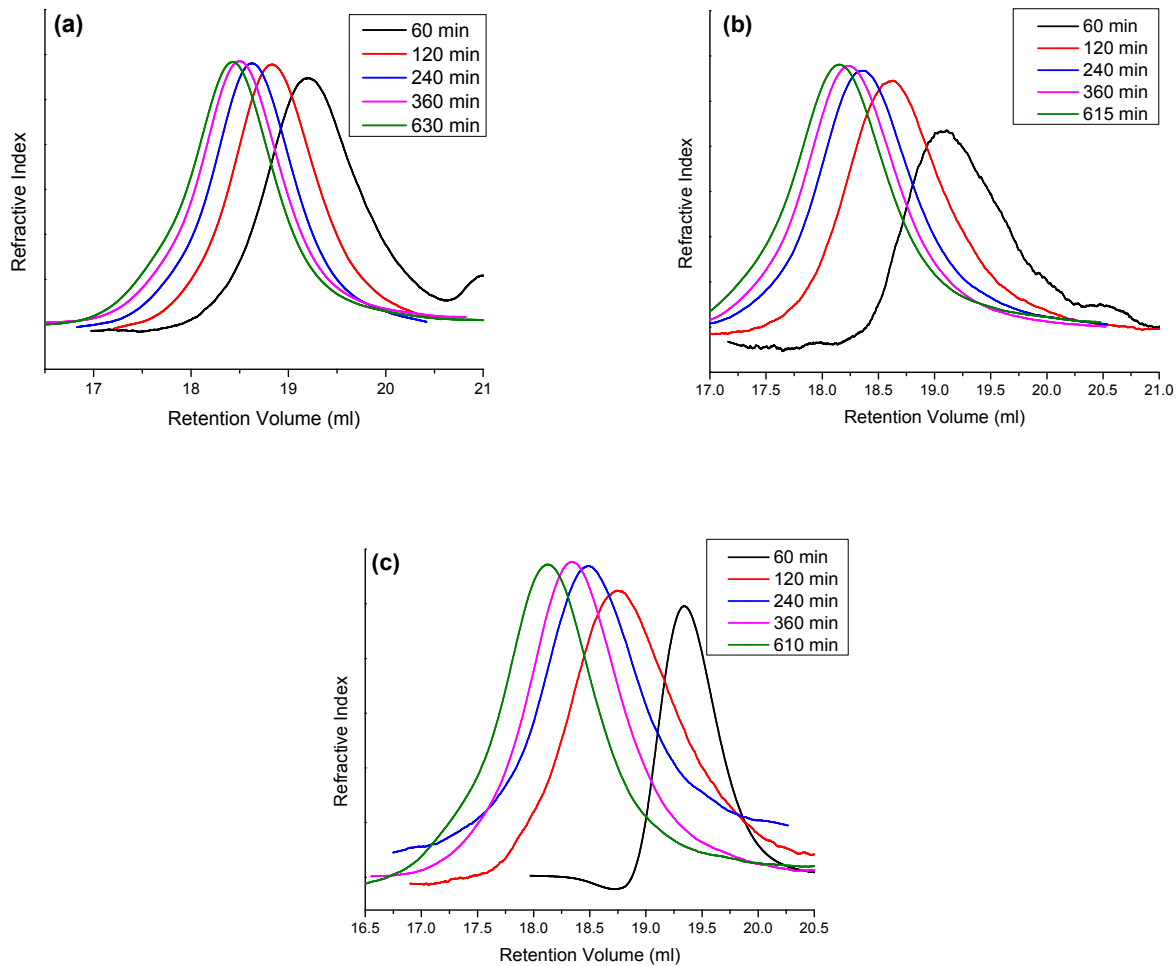

**Figure S14:** GPC DRI Chromatograms of catechol end-functionalized polyacrylamide (Dopa-PAM) synthesized with (a) Dopa-DDMAT, (b) Dopa-DoPAT and (c) Dopa-CDSPA.

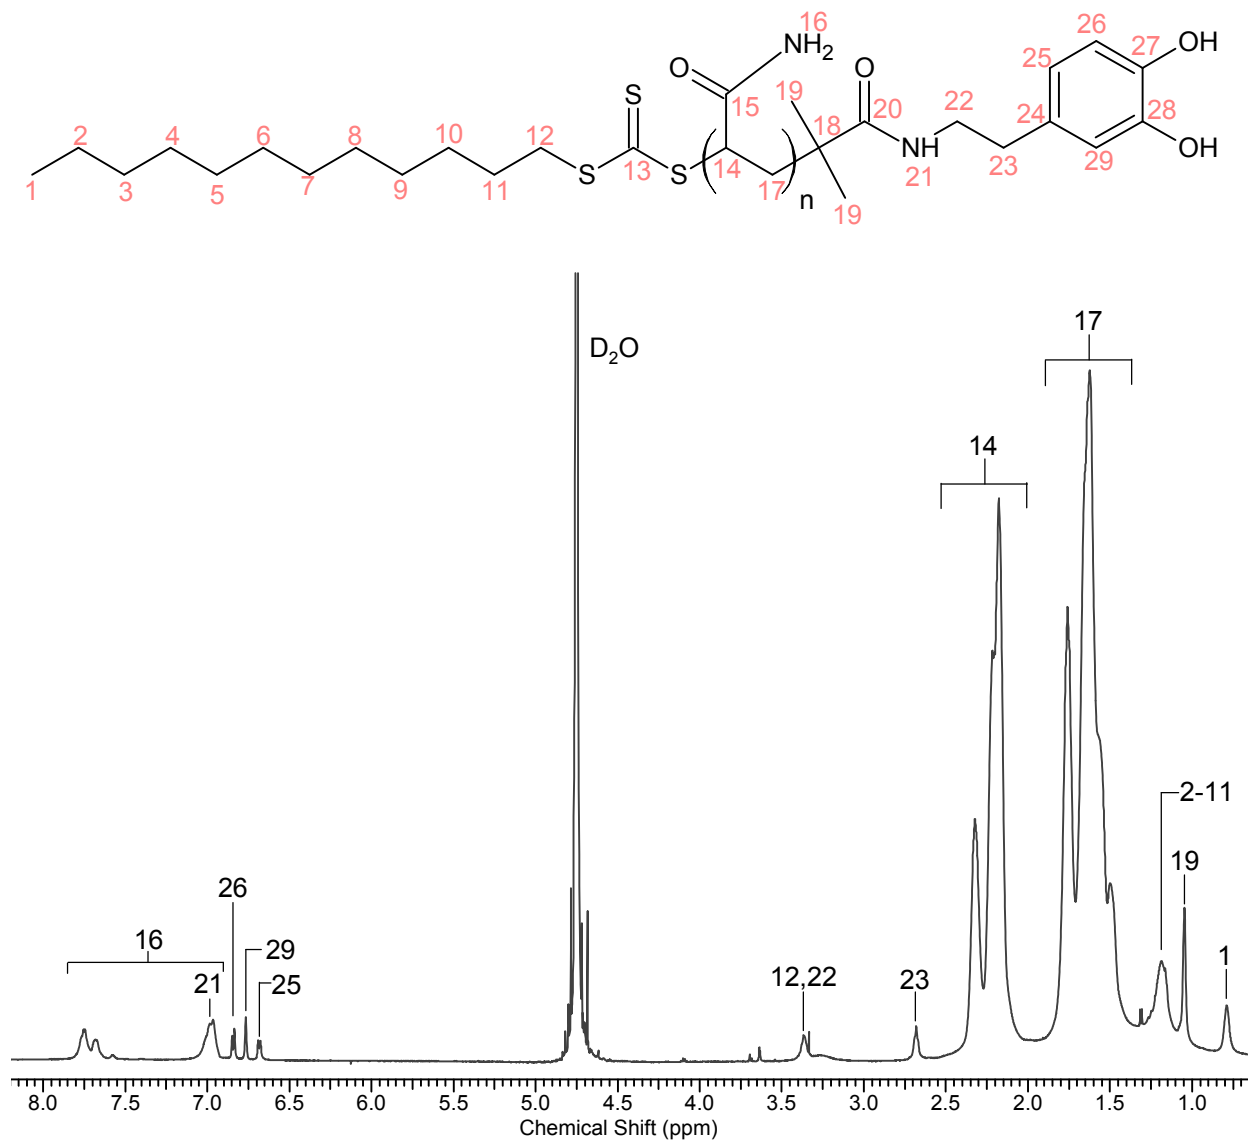

**Figure S15.** <sup>1</sup>H NMR spectrum of the synthesized DPAM (4a) in D<sub>2</sub>O (600 MHz, @ 25°C)

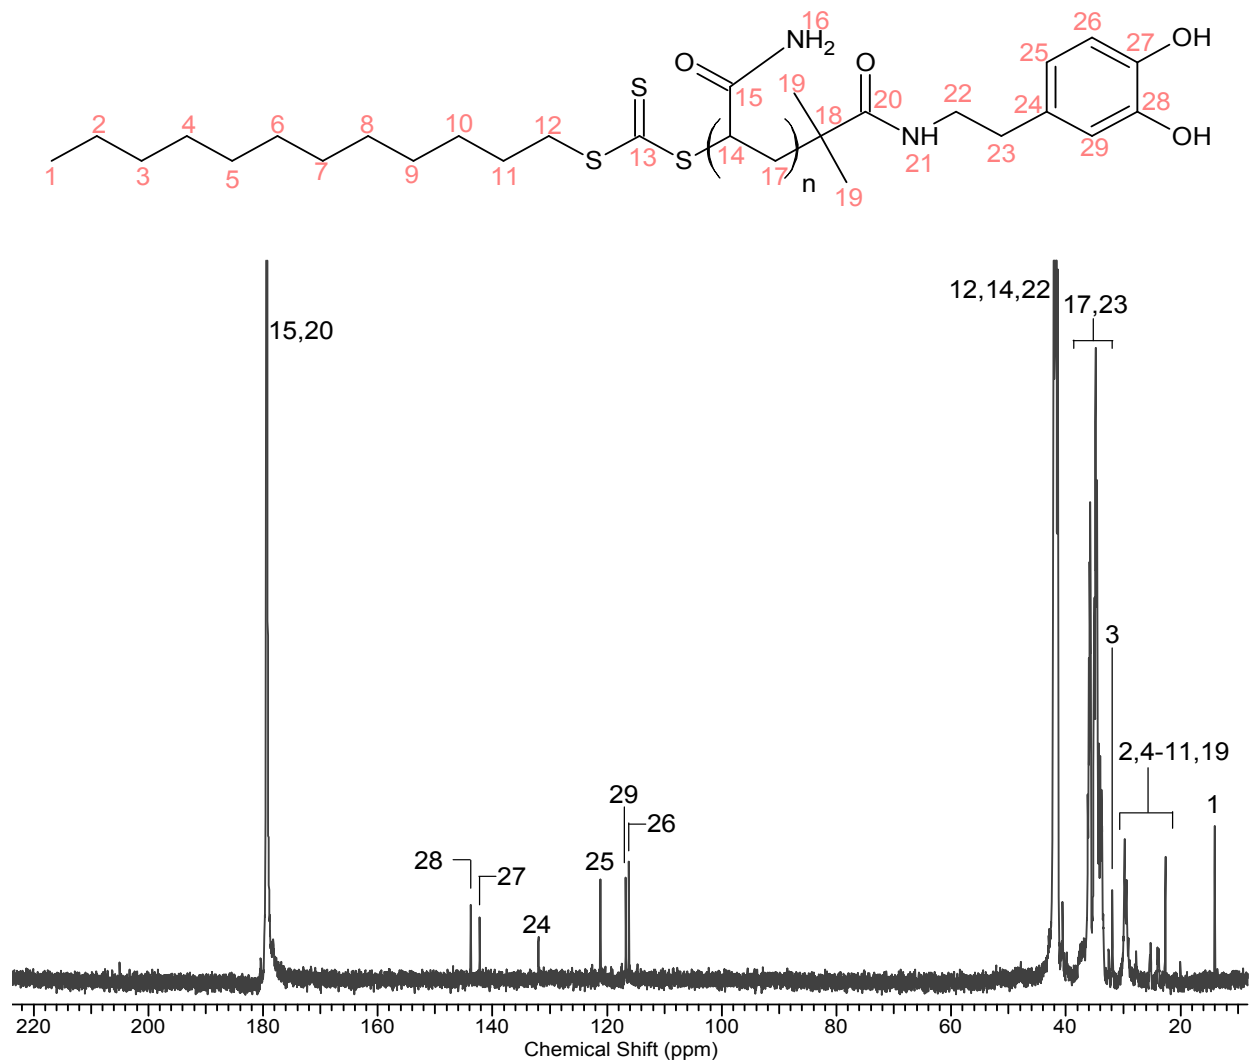

**Figure S16.**  $^{13}\text{C}$  NMR spectrum of the synthesized DPAM (**4a**) in  $\text{D}_2\text{O}$  (100 MHz, @ 25°C)
